# Supplementary material for: Citrate/F− assisted phase control synthesis of TiO2 nanostructures and their photocatalytic properties
Source: Royal Society of Chemistry journal article supplement (doi:10.1039/c5ra08816j), 2015-01-01
Supplement: c5ra08816j1.pdf [file c5ra08816j1.pdf]

## Supporting Information

### Citrates/F- assisted phase control synthesis of TiO<sub>2</sub> nanostructures and their photocatalytic properties

Zhiqiang Guo, Chao Li, Shuanglong Lu, Yue Pan\*, Hongwei Gu\*

#### 5 Experimental Section

##### TEM of TiO<sub>2</sub> at different temperature

Figure S1A, S1B and S1C are corresponding to the temperature is 160 °C, 180 °C and 200 °C respectively. When the temperature is relatively low, crystallinity is not very good and it took more 10 time to make the reaction proceed completely. When the temperature is high, the as-synthesized materials tend to aggregate together as shown in Figure S1C. So we choose 180 °C as the best temperature. As for the reaction time, if we quitted the reaction at an earlier stage, the precursor was not consumed thoroughly and if we quitted later, the material we obtained did not have notable changes. Therefore, we choose 18 h as the best reaction time.

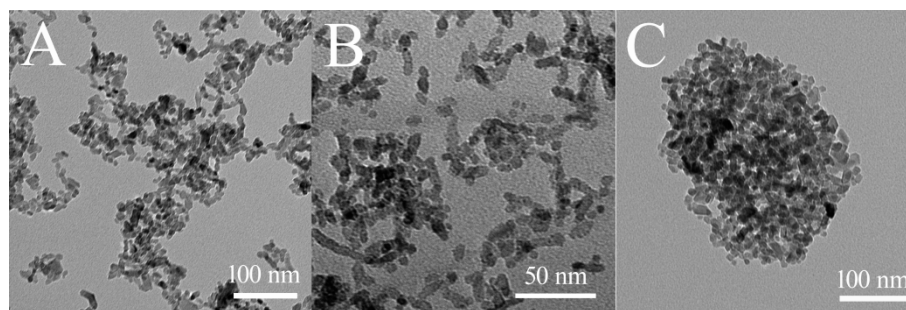

Figure S1. TEM images of TiO<sub>2</sub> in different reaction time and condition ( $r_c=1:0.0125$ ): (A) 160 °C for 18 h; (B) 180 °C for 18 h; (C) 200 °C 18 h.

#### 20 UV-vis diffuse reflectance spectra of the as-synthesized TiO<sub>2</sub>

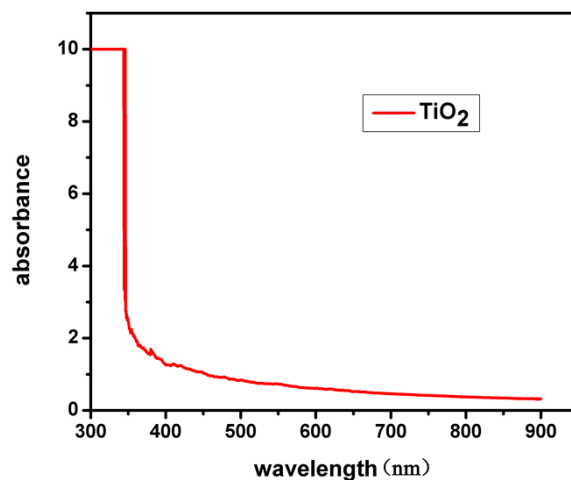

Figure S2. UV-vis diffuse reflectance spectra of the TiO<sub>2</sub> we synthesized. Reaction condition:  $r_c=1:0.0125$ , 180 °C for 18 h

## The influence of pH value on the reaction process

We added possible species of titanium citrate anions and their transformations in the Ti citrate system 5 under the influence of pH according to published papers.

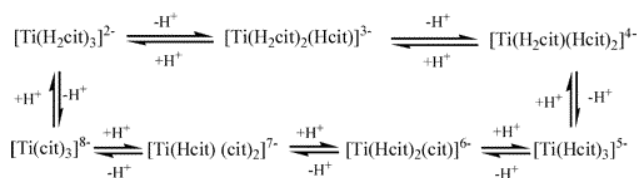

Scheme S1. Possible Species of Titanium Citrate Anions ( $[\text{Ti}(\text{cit})_3]^{8-}$ ) and Their Transformations in the Ti Citrate System.

## 10 TEM of $\text{TiO}_2$ when more SC was added

If more SC was added into the solution, the fresh SC reacted with precipitates again and constructed a more stable sol.

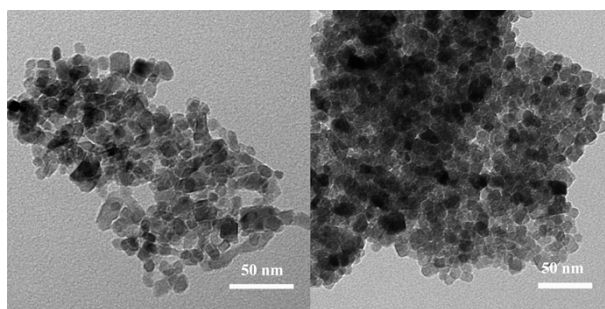

15 Figure S2 TEM image of the  $\text{TiO}_2$  : the left one  $r_c=100:0$ , the right one  $r_c=100:15$  (the reaction time and condition were  $180^\circ\text{C}$  and 18h).

## The TEM image of $\text{TiO}_2$ (4 mmol NaCl was added)

20 We added the situation where 4 mmol NaCl worked as the regulating reagent. The TEM image is shown in Figure S3 and we can find the particle size and shape did not changed.

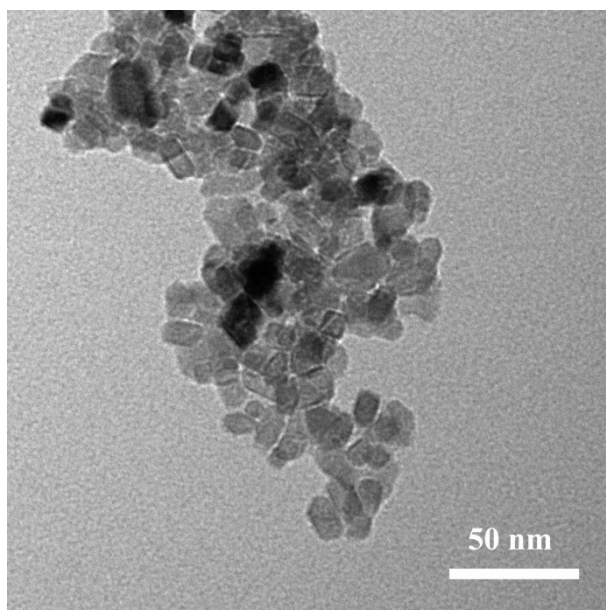

Figure S3. TEM image of the  $\text{TiO}_2$  when 4 mmol of NaCl was added ( $r_c=1:0.025$ ) and the reaction time and condition were  $180^\circ\text{C}$  and 18h.
